# Supplementary material for: Nuclease stability of boron-modified nucleic acids: application to label-free mismatch detection
Source: Royal Society of Chemistry journal article supplement (doi:10.1039/c5ob01815c), 2015-01-01
Supplement: c5ob01815c1.pdf [file c5ob01815c1.pdf]

## **ELECTRONIC SUPPLEMENTARY INFORMATION**

### Nuclease Stability of Boron-Based Nucleic Acids: Application to Label-Free Mismatches Detection

*Maëva Reverte, Jean-Jacques Vasseur and Michael Smietana\**

*Institut des Biomolécules Max Mousseron, IBMM UMR 5247 CNRS, Université de Montpellier, place Eugène Bataillon, 34095 Montpellier, France*

#### **Table of Contents**

|                                                                 |     |
|-----------------------------------------------------------------|-----|
| List of Tables and Figures                                      | S2  |
| General experimental section                                    | S3  |
| Synthesis of boronooligonucleotides                             | S4  |
| Analysis of oligonucleotides                                    | S5  |
| Native Polyacrylamide Gel Electrophoresis                       | S6  |
| Exonuclease experiments                                         | S7  |
| Denaturation experiments (Melting curves and their derivatives) | S10 |
| Fluorescence experiments                                        | S17 |

## **List of Tables and Figures**

**Table S1.** Coupling conditions for oligonucleotides syntheses

**Table S2.** MALDI MS of synthesized ONs

**Table S3.** Reagent volumes for a 40 mL gel

**Figure S1.** PAGE of oligonucleotides stabilities against SVPDE

**Figure S2.** PAGE of oligonucleotides stabilities against CSPDE

**Figure S3.** HPLC chromatograms of oligonucleotides stabilities ODN1/ODN4/ODN5 against CSPDE

**Table S4.**  $T_m$  values of ODNs complex

**Figure S4.** Fluorescence intensity responses of WT<sub>R516G</sub> target (in grey) and MT<sub>R516G</sub> target (in orange) samples directed to the R516G mutation in the CFTR gene.

**Figure S5.** Fluorescence intensity increase of WT<sub>R516G</sub> target and MT<sub>R516G</sub> target in function of sample concentration.

## **General**

All reagents were purchased from Aldrich or local suppliers and used without purification. All oligonucleotides used for this study were performed in 1  $\mu$ mol scale using ABI 381A DNA synthesizer by classical phosphoramidite chemistry. All oligonucleotides were analyzed by RP-HPLC (Dionex Ultimate 3000) with an Accucore aQ C18 column (50x4.6 mm; Thermoscientific) and by MALDI-TOF MS (Voyager PerSeptive Biosystems) using trihydroxyacetophenone or 3-hydroxypicolinic acid as matrix and ammonium citrate as co-matrix. Native PAGE experiments were performed on a Hoefer SE600X apparatus and revealed with GelRed Nucleic Acid Gel Stain using E-BOX-VX5/20MX. Thermal denaturation experiments were performed on a VARIAN Cary 300 UV spectrophotometer equipped with Peltier temperature controller and thermal analysis software. Fluorescence experiments were performed on a spectrofluorometer FP-8300 (Jacso).

## Synthesis of boronooligonucleotides

Syntheses were performed in 1  $\mu\text{mol}$  scale using ABI 381A DNA synthesizer by phosphoramidite chemistry with conditions described in Table S1. dTbn-phosphoramidite was synthesized and incorporated at the 5'-end of an oligonucleotide according to previous records.<sup>1</sup>

**Table S1.** Coupling conditions for oligonucleotide syntheses.

| Step | Reaction   | Reagent                                                             | Time (s) |
|------|------------|---------------------------------------------------------------------|----------|
| 1    | Deblocking | 3% TCA in DCM                                                       | 35       |
| 2    | Coupling   | 0.1M amidite in CH <sub>3</sub> CN + 0.3M BMT in CH <sub>3</sub> CN | 180      |
| 3    | Capping    | Ac <sub>2</sub> O/THF/Pyridine + 10% NMI in THF                     | 8        |
| 4    | Oxidation  | 0.1M I <sub>2</sub> in THF/H <sub>2</sub> O/Pyridine                | 15       |

<sup>1</sup> A. R. Martin, K. Mohanan, D. Luvino, N. Floquet, C. Baraguey, M. Smietana, J. J. Vasseur, *Org. Biomol. Chem.* **2009**, *7*, 4369-4377.

### Analysis of oligonucleotides used by MALDI-TOF MS

All oligonucleotides synthesized were analyzed by MALDI-TOF MS and the results are presented in the table below (Table S2). Previous reports from our group<sup>3</sup> revealed that compared to the corresponding nicked systems, one boronate linkage induces stabilizations in the range of  $\Delta T_m = + 2.5-5.0$  °C at pH 7.5 and  $\Delta T_m = + 4.0-10.0$  °C at pH 9.5. These values depend on the nature and length of the sequences. The intrinsic nature of boronate internucleosidic linkages is their reversibility and pH-dependencies. While these properties allow a precise control of the ligation, the stabilization induced cannot compete with irreversible covalent bonds. Though in the lower range, the observed melting temperatures of systems ODN2/ODN4/ODN5 and ODN1/ODN4/ODN5 (Table S4) are in accordance with the one observed in earlier studies.

**Table S2.** MALDI MS of synthesized ODNs.

| ODNs                | Sequence                                      | Calcd $m/z$ <sup>a</sup><br>[M-H] <sup>-</sup> | Obs $m/z$<br>[M-H] <sup>-</sup> |
|---------------------|-----------------------------------------------|------------------------------------------------|---------------------------------|
| ODN1                | 5'-T <sup>bn</sup> GAATACAAATT                | 3657.2                                         | 3657.6                          |
| ODN2                | 5'-TGAATACAAATT                               | 3651.4                                         | 3651.6                          |
| ODN3                | 5'-pTGAATACAAATT                              | 3731.4                                         | 3731.8                          |
| ODN4                | 5'-TTTGTATTCAGCCCATATCTT                      | 6336.1                                         | 6336.5                          |
| ODN5                | 5'-GAT ATG GGrC                               | 2793.8                                         | 2794.3                          |
| ODN6                | 5'-AAGATATGGGTGAATACAAA                       | 6510,3                                         | 6510,9                          |
| ODN7                | 5'-T <sup>bn</sup> AT ATT                     | 1786,0                                         | 1786,2                          |
| ODN8                | 5'-T <sup>bn</sup> CT ATA                     | 1771,0                                         | 1771,2                          |
| ODN9                | 5'-T <sup>bn</sup> AT CTA                     | 1771,0                                         | 1770,7                          |
| WT <sub>R516G</sub> | 5'-CTA TGA TGA ATA TAG ATA CAG AAG<br>CGT CAT | 9261,0                                         | 9260,9                          |
| MT <sub>R516G</sub> | 5'-CTA TGA TGA ATA TGG ATA CAG AAG<br>CGT CAT | 9277,0                                         | 9277,6                          |

|                     |                                  |        |        |
|---------------------|----------------------------------|--------|--------|
| ODN10               | 5'-ACG CTT CTG TAT rC            | 3915,6 | 3915,6 |
| ODN11               | 5'-ATG ACG CTT CTG TrA           | 4268,8 | 4268,9 |
| ODN12               | 5'-ATG ACG CTT CTrG              | 3651,4 | 3651,4 |
| WT <sub>C491R</sub> | 5'-AAC TGA CAA TAG AAT GAA ATT C | 6758,4 | 6757,9 |
| MT <sub>C491R</sub> | 5'-AAC TGA CAA CAG AAT GAA ATT C | 6743,4 | 6743,9 |
| ODN13               | 5'- T <sup>bn</sup> TC TGT       | 1778,0 | 1778,6 |
| ODN14               | 5'-GAA TTT CrA                   | 2423,6 | 2423,9 |

<sup>a</sup> 5'Tbn derivatives are always detected as [(M-2H<sub>2</sub>O)-H]<sup>-2</sup>

### Native Polyacrylamide Gel Electrophoresis

Native PAGE experiments were performed with polyacrylamide gels (18.5x16.4 cm, 0,75mm of thickness) prepared by mixing: TrisBorate EDTA (TBE) 1X solution, ammonium peroxodisulfate (APS), Acrylamide/*N,N'*-methylenebisacrylamide (19/1 v/v), and *N,N,N',N'*-tetramethyl-ethylenediamine (TEMED) in proportion shown below (Table S3). 20% polyacrylamide gels were used for the migration of single strand DNA and 15% polyacrylamide gels were used for DNA duplexes. Freshly casted gels were pre-runned at constant power of 20 W for 30 min at 4°C. After loading of the samples the run were performed at constant power of 20 W for 1 h at 4°C. The gels were revealed for the single strand using GelStain and for the duplex with GelRed Nucleic Acid Gel Stain. The bands were observed using E-BOX-VX5/20MX with vision capt software.

**Table S3.** Reagent volumes for a 40 mL gel

<sup>2</sup> (a) A. R. Martin, I. Barvik, D. Luvino, M. Smietana and J. J. Vasseur, *Angew. Chem., Int. Ed.*, **2011**, *50*, 4193; (b) M. Smietana, A. R. Martin and J. J. Vasseur, *Pure Appl. Chem.*, **2012**, *84*, 1659; (c) R. Barbeyron, J.-J. Vasseur and M. Smietana, *Chem. Sci.*, **2015**, *6*, 542. (d) R. Barbeyron, J. Wengel, J. J. Vasseur and M. Smietana, *Monatsh. Chem.*, **2013**, *144*, 495–500.

| Reagent                                                   | Quantity   |
|-----------------------------------------------------------|------------|
| Volume of Acrylamide/ <i>N,N'</i> -methylenebisacrylamide |            |
| -For a 20% gel                                            | 20 mL      |
| -For a 15% gel                                            | 15 mL      |
| APS                                                       | 400 mg     |
| TEMED                                                     | 20 $\mu$ L |
| TBE buffer 1X                                             | QSP 40 mL  |

### **Exonuclease experiments**

For all exonuclease experiments, aliquots were removed at different time points, heated to 90°C for 20 min to stop enzymatic activity and then analyzed by MALDI-TOF MS, RP-HPLC and PAGE. Half-lives were monitored by RP-HPLC and determined by the loss of 50% of the full-length ODN. The controlled digestion procedures followed protocols provided by commercial suppliers for optimal enzymatic activities.

#### **-Exonuclease I (3'-exonuclease)**

In a typical experiment, 1  $\mu$ L of 1 mM target DNA in commercial buffer 1X (final volume 20  $\mu$ L; pH 9.5) was mixed with 10 U of the enzyme (Thermoscientific) and incubated at 37°.

#### **-Exonuclease III (3'-exonuclease)**

In a typical experiment, 1  $\mu\text{L}$  of 1 mM target DNA in commercial buffer 1X (final volume 20  $\mu\text{L}$ ; pH 8.0) was mixed with 50 U of the enzyme (Thermoscientific) and incubated at 37°.

-Lambda exonuclease (5'-exonuclease)

In a typical experiment, 1  $\mu\text{L}$  of 1 mM target DNA in commercial buffer 1X (final volume 50  $\mu\text{L}$ ; pH 9.4) was mixed with 10 U of the enzyme (Thermoscientific) and incubated at 37°.

-Snake Venom Phosphodiesterase I (3'-exonuclease)

In a typical experiment, 1  $\mu\text{L}$  of 1 mM target DNA in ammonium citrate buffer 450mM (final volume 20  $\mu\text{L}$ ; pH 8.5) was mixed with 0.004 U of the enzyme (Aldrich) and incubated at 37°.

**Figure S1.** PAGE of oligonucleotides stability against SVPDE

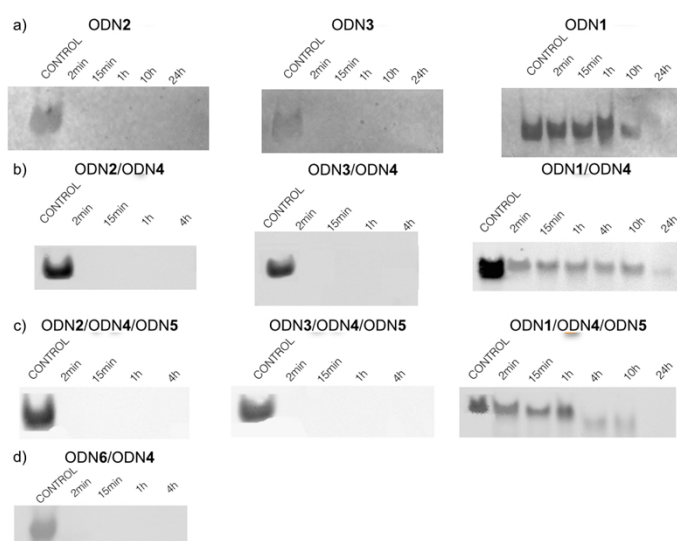



-Calf spleen phosphodiesterase II (5-exonuclease)

In a typical experiment, 1  $\mu$ L of 1 mM target DNA in trihydroxyacetophenone/ ammonium citrate buffer (22:1) (final volume 20  $\mu$ L; pH 8.5) was mixed with 0.01 U of the enzyme (Aldrich) and incubated at 37°.

**Figure S2.** PAGE of oligonucleotides stability against CSPDE

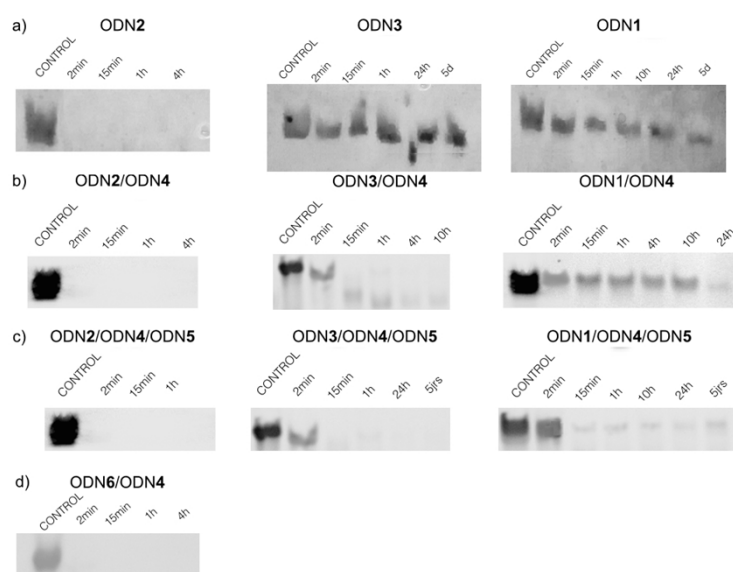

**Figure S3.** HPLC chromatograms of oligonucleotides stability ODN1/ODN4/ODN5 against CSPDE

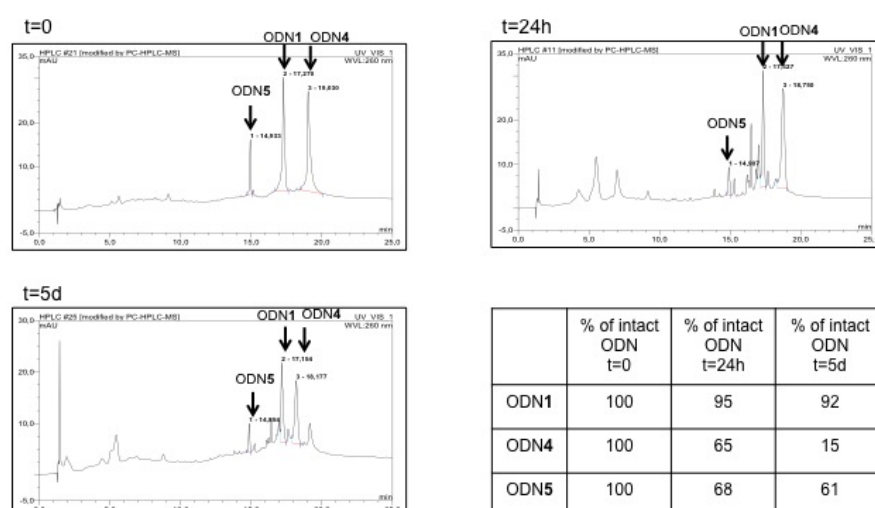

## **Denaturation experiments**

The samples were prepared by mixing each DNA strand to give a 3  $\mu\text{M}$  final concentration of each partner in a 1M NaCl, 10mM sodium cacodylate buffer at pH 7,5 and 9,5. A heating-cooling-heating cycle in the 0-90°C temperature range with a gradient of 0,5°C/min was supplied. In all experiments, melting curves resolution allowed the extraction of independent melting transitions.  $T_m$  values were determined from the maxima of the first derivative plots of absorbance at 260 nm versus temperature.

As expected, systems involving three partners featured a double sigmoidal transition (entries 2, 4 and 6). The first transition corresponds to ODN1/ODN4, ODN2/ODN4 or ODN3/ODN4 half-duplexes respectively. The second transition corresponds to ODN5/ODN4 half-duplex. For the entry 6, the melting temperature of the lower transition is found to be pH-dependent and corresponds to the formation of a novel boronate-linked full duplex.

**Table S4.** T<sub>m</sub> values of ODNs complex

| Entry | ODNs complex              | T <sub>m</sub> values (°C) |           |
|-------|---------------------------|----------------------------|-----------|
|       |                           | pH 7,5                     | pH 9,5    |
| 1     | ODN2/ODN4                 | 33,7                       | 33,7      |
| 2     | ODN2/ODN4/ODN5            | 35,7/47,7                  | 36,7/47,7 |
| 3     | ODN3/ODN4                 | 32,6                       | 33,6      |
| 4     | ODN3/ODN4/ODN5            | 35,6/47,7                  | 34,6/47,7 |
| 5     | ODN1/ODN4                 | 31,7                       | 31,7      |
| 6     | ODN1/ODN4/ODN5            | 37,7/47,7                  | 40,7/47,7 |
| 7     | ODN6/ODN4                 | 51,6                       | 51,2      |
| 8     | ODN7/WT <sub>R516G</sub>  | 50,6                       | -         |
| 9     | ODN8/WT <sub>R516G</sub>  | 50,8                       | -         |
| 10    | ODN9/WT <sub>R516G</sub>  | 50,8                       | -         |
| 11    | ODN7/MT <sub>R516G</sub>  | 41,7                       | -         |
| 12    | ODN8/MT <sub>R516G</sub>  | 41,7                       | -         |
| 13    | ODN9/MT <sub>R516G</sub>  | 40,6                       | -         |
| 14    | ODN13/WT <sub>C491R</sub> | 38,6                       | -         |
| 15    | ODN13/MT <sub>C491R</sub> | 46,8                       | -         |

## Melting curves and their derivatives

**Table S4, entry 1:**

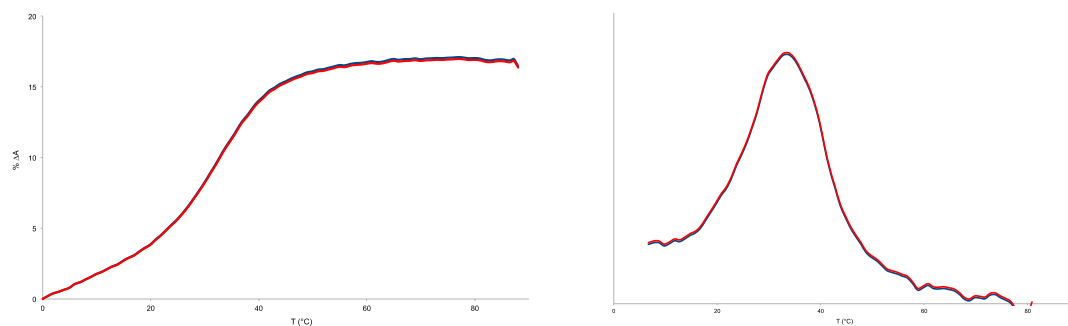

Melting curves and their derivatives of the complex ODN2/ODN4 at pH 7,5 (blue) and pH 9,5 (red).

**Table S4, entry 2:**

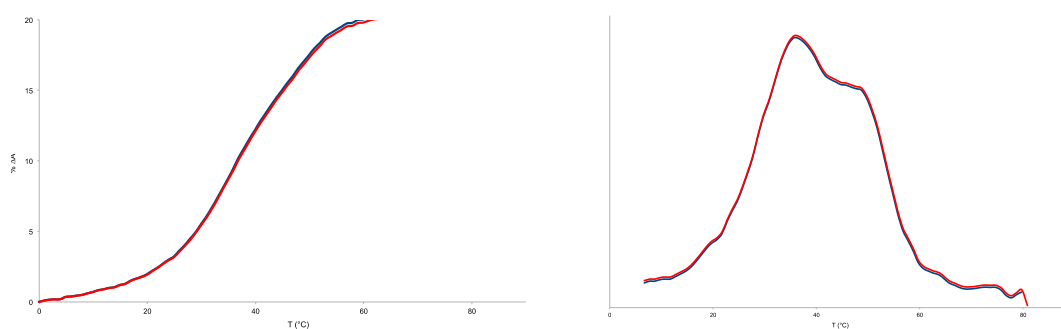

Melting curves and their derivatives of the complex ODN2/ODN4/ODN5 at pH 7,5 (blue) and pH 9,5 (red).

**Table S4, entry 3:**

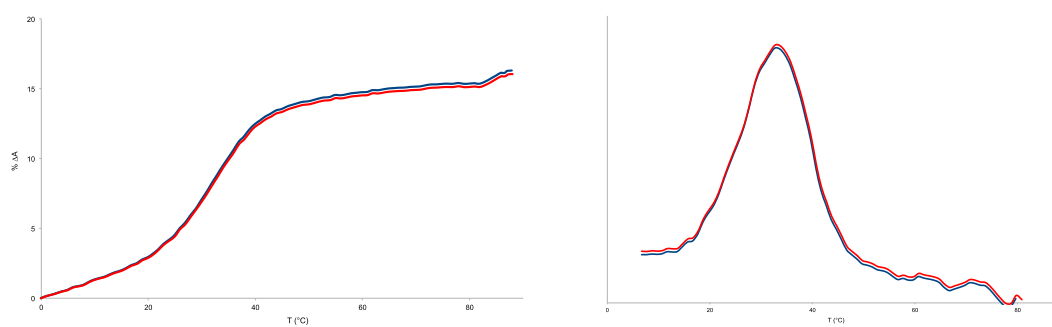

Melting curves and their derivatives of the complex ODN3/ODN4 at pH 7,5 (blue) and pH 9,5 (red).

**Table S4**, entry 4:

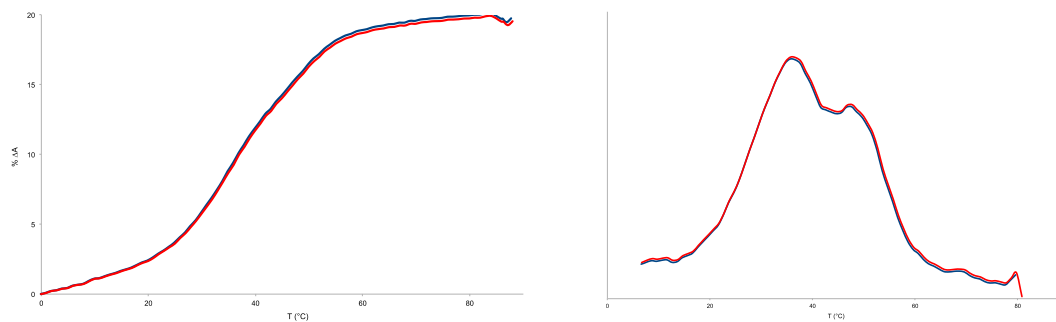

Melting curves and their derivatives of the complex ODN3/ODN4/ODN5 at pH 7,5 (blue) and pH 9,5 (red).

**Table S4**, entry 5:

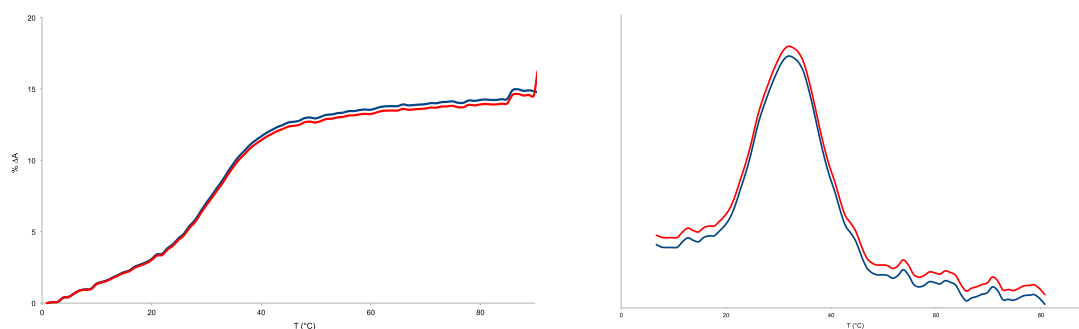

Melting curves and their derivatives of the complex ODN1/ODN4 at pH 7,5 (blue) and pH 9,5 (red).

**Table S4**, entry 6:

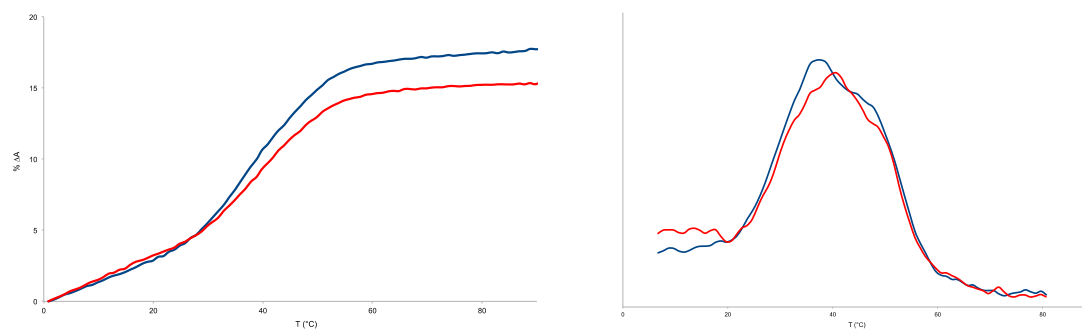

Melting curves and their derivatives of the complex ODN1/ODN4/ODN5 at pH 7,5 (blue) and pH 9,5 (red).

**Table S4, entry 7:**

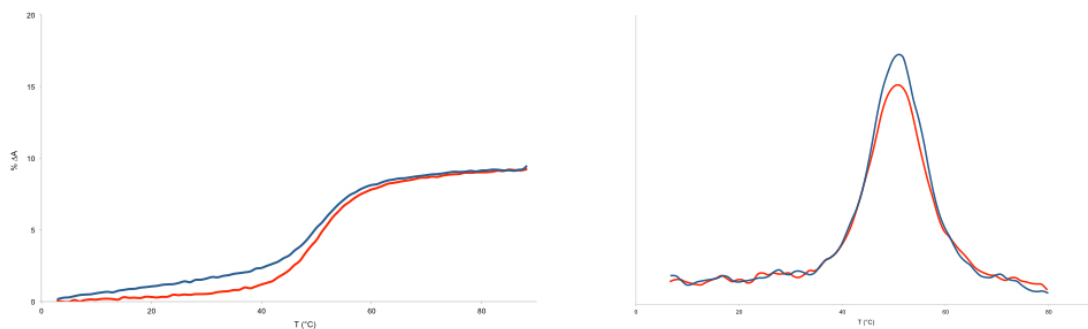

Melting curves and their derivatives of the complex ODN6/ODN4 at pH 7,5 (blue) and pH 9,5 (red).

**Table S4, entry 8:**

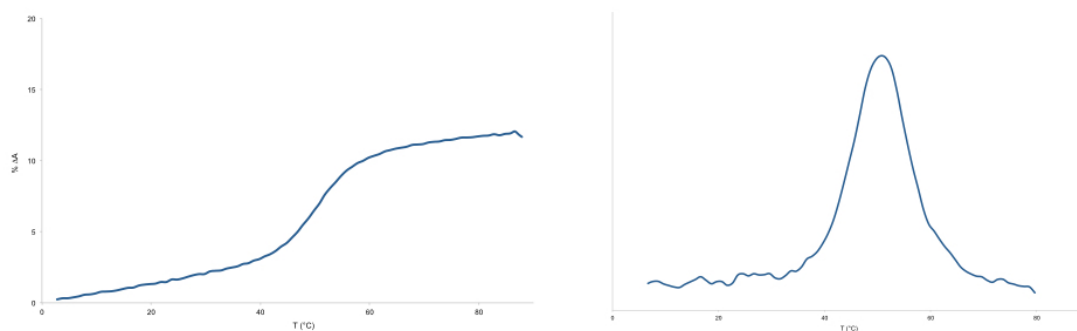

Melting curves of the complex ODN7/WT<sub>R516G</sub> at pH 7,5.

**Table S4, entry 9:**

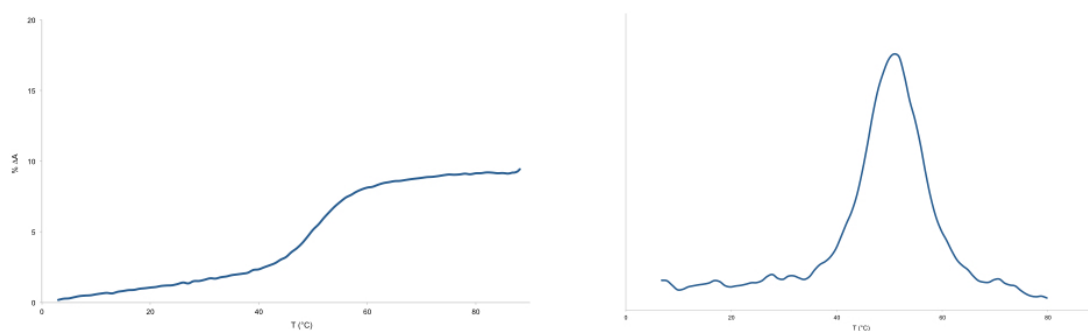

Melting curves of the complex ODN8/WT<sub>R516G</sub> at pH 7,5.

**Table S4, entry 10:**

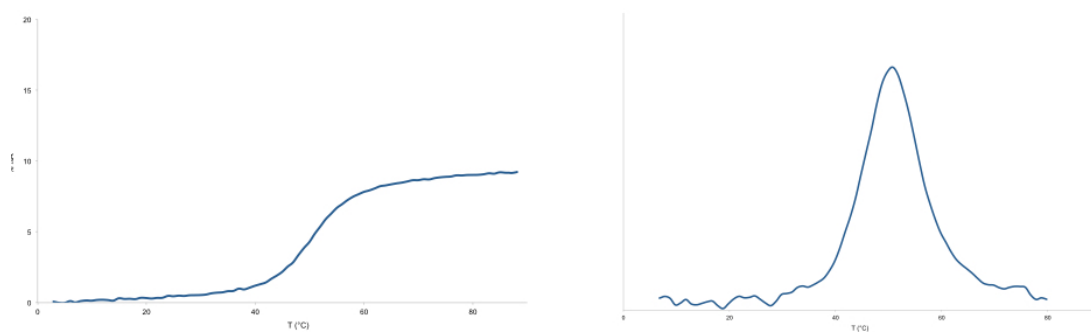

Melting curves of the complex ODN9/WT<sub>R516G</sub> at pH 7,5.

**Table S4, entry 11:**

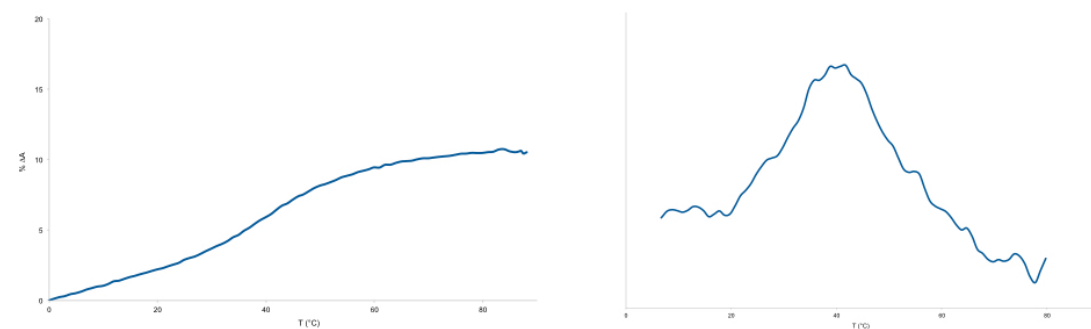

Melting curves of the complex ODN7/MT<sub>R516G</sub> at pH 7,5.

**Table S4, entry 12:**

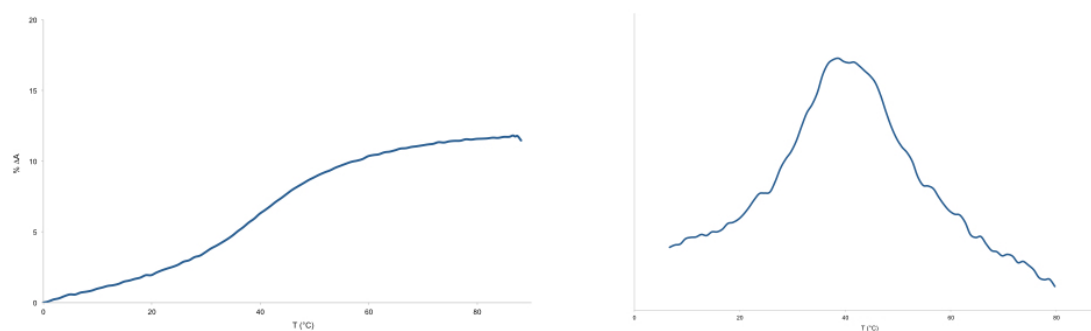

Melting curves of the complex ODN8/WT<sub>R516G</sub> at pH 7,5.

**Table S4, entry 13:**

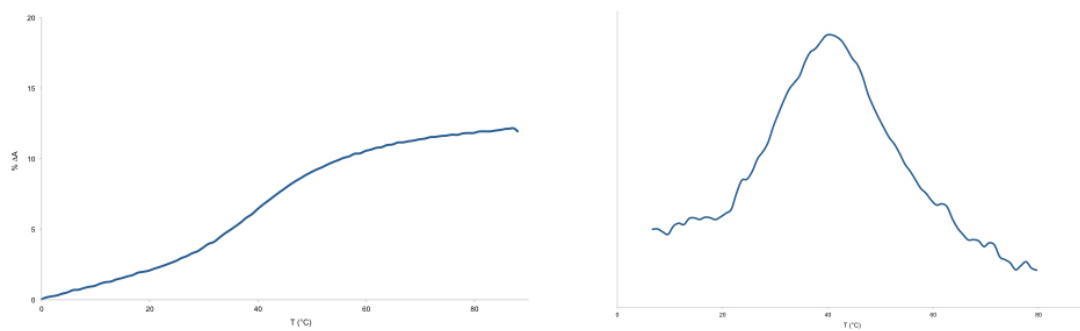

Melting curves of the complex ODN9/WT<sub>R516G</sub> at pH 7,5.

**Table S4, entry 14:**

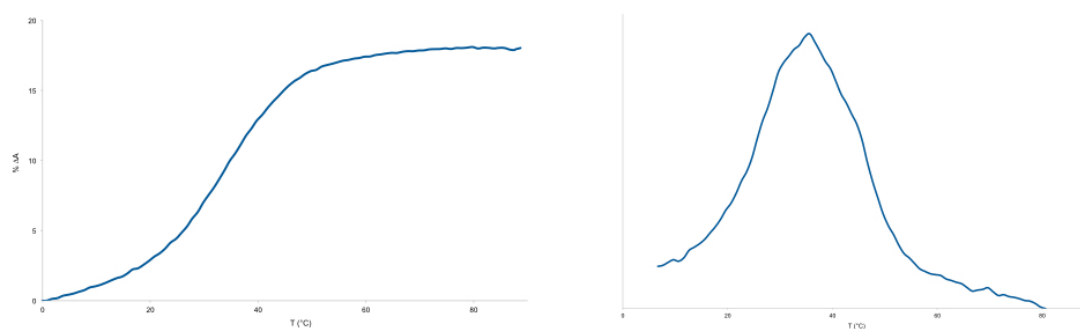

Melting curves of the complex ODN13/WT<sub>C491R</sub> at pH 7,5.

**Table S4, entry 15:**

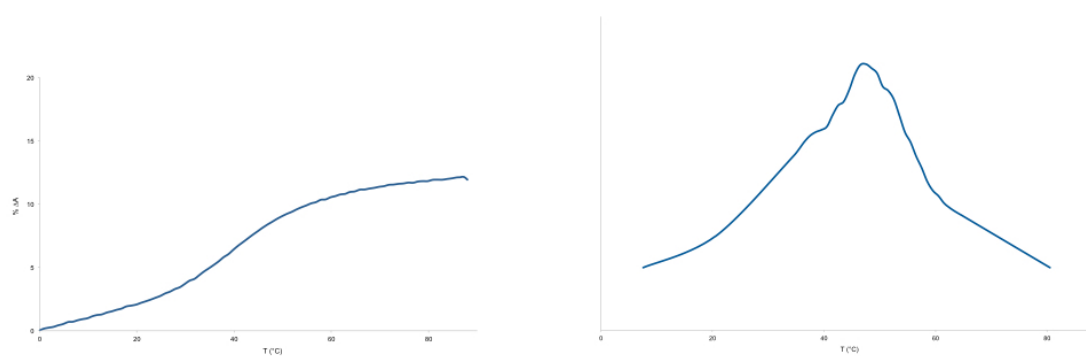

Melting curves of the complex ODN13/MT<sub>C491R</sub> at pH 7,5.



## Fluorescence experiments

The snake venom phosphodiesterase degradation was performed like described before on 4  $\mu\text{L}$  of 0.5  $\mu\text{M}$  target DNA (page S6). After 30 minutes of incubation at 37°C, the sample was heated at 100°C during 20 minutes and 4  $\mu\text{L}$  of SYBR green stock solution (1250 equivalents)<sup>3</sup> were added to the mixture (final volume 100  $\mu\text{L}$ ). The fluorescence measurement was performed at ambient temperature in a 100  $\mu\text{L}$  Quartz SUPRASIL cell at different time and the fluorescence signal was collected from 500 to 600 nanometers.

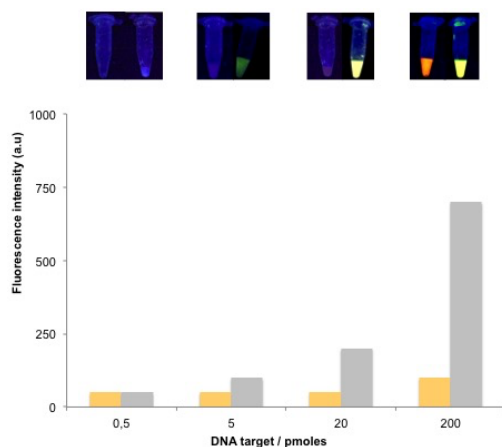

**Figure S4.** Fluorescence intensity responses of WT<sub>R516G</sub> target (in grey) and MT<sub>R516G</sub> target (in orange) samples directed to the R516G mutation in the CFTR gene.

<sup>3</sup> (a) V. L. Singer, T. E. Lawlor and S. Yue, *Mutat. Res.-Gen. Tox. En.*, 1999, **439**, 37; (b) D. Xiang, K. Zhai, W. Xiang and L. Wang, *Talanta*, 2014, **129**, 249; (c) A. Zheng, M. Luo, D. Xiang, X. Xiang, X. Ji and Z. He, *Talanta*, 2013, **114**, 49.

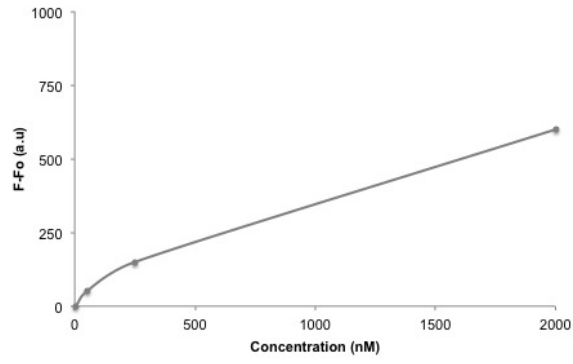

**Figure S5.** Fluorescence intensity increase of WT<sub>R516G</sub> target and MT<sub>R516G</sub> target in function of sample concentration.
